# Supplementary material
Source: PubMed Central journal article supplement (PMC7045569)
Supplement: ao9b03727_si_001.pdf [file ao9b03727_si_001.pdf]

## Supplementary Information

# A Redox-Innocent Uranium(IV)-Quinoid Metal-Organic Framework

*Vanja E. Refn, Mariusz Kubus, Susanne Mossin, René Wugt Larsen, Kasper S. Pedersen\**

*Department of Chemistry, Technical University of Denmark, Kemitorvet, DK-2800 Kgs.  
Lyngby, Denmark  
E-mail: [kasp@kemi.dtu.dk](mailto:kasp@kemi.dtu.dk) (K.S.P.)*

*ACS Omega*

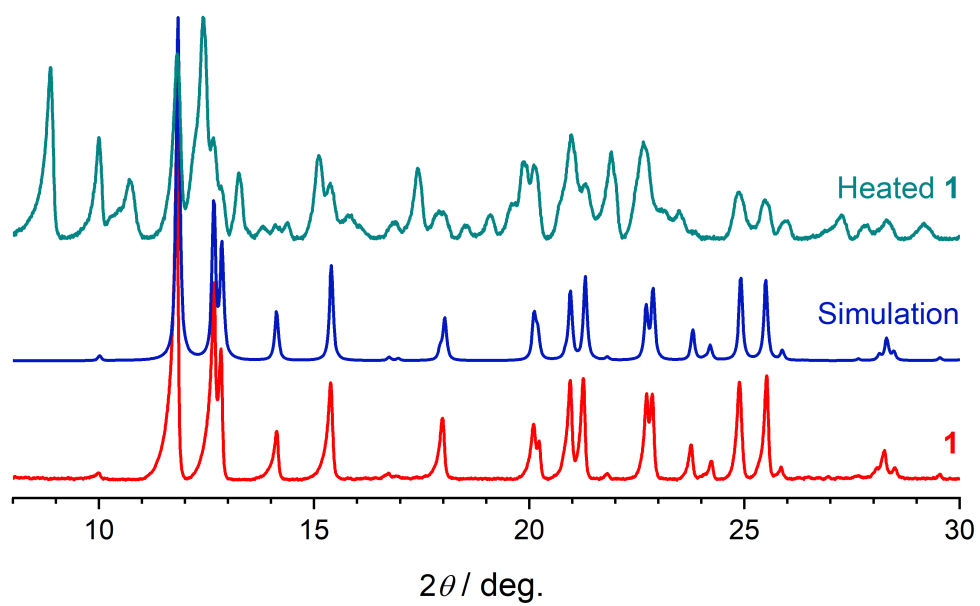

**Figure S1.** Experimental (red) and simulated (blue) X-ray powder diffractogram of **1** obtained at RT. The turquoise trace is the powder diffractogram of a sample of **1** heated to 100 °C ( $0.1 \text{ K min}^{-1}$ ) under a dry dinitrogen atmosphere.

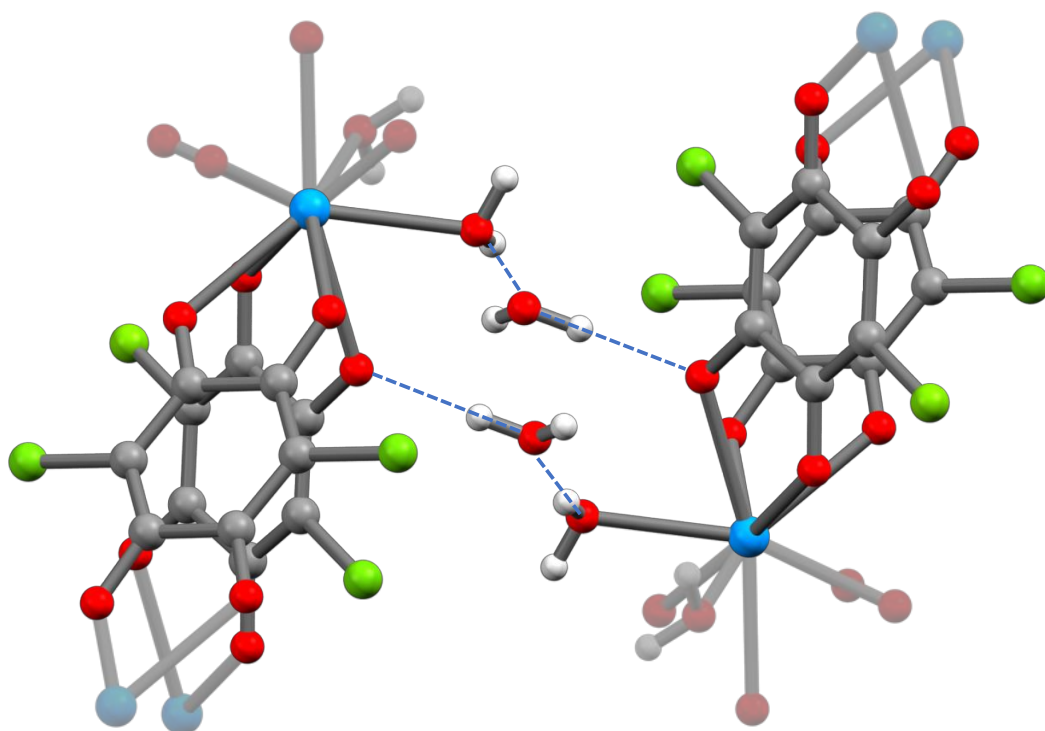

**Figure S2.** Hydrogen bonding pattern of the inter-pore water molecules in **1**.

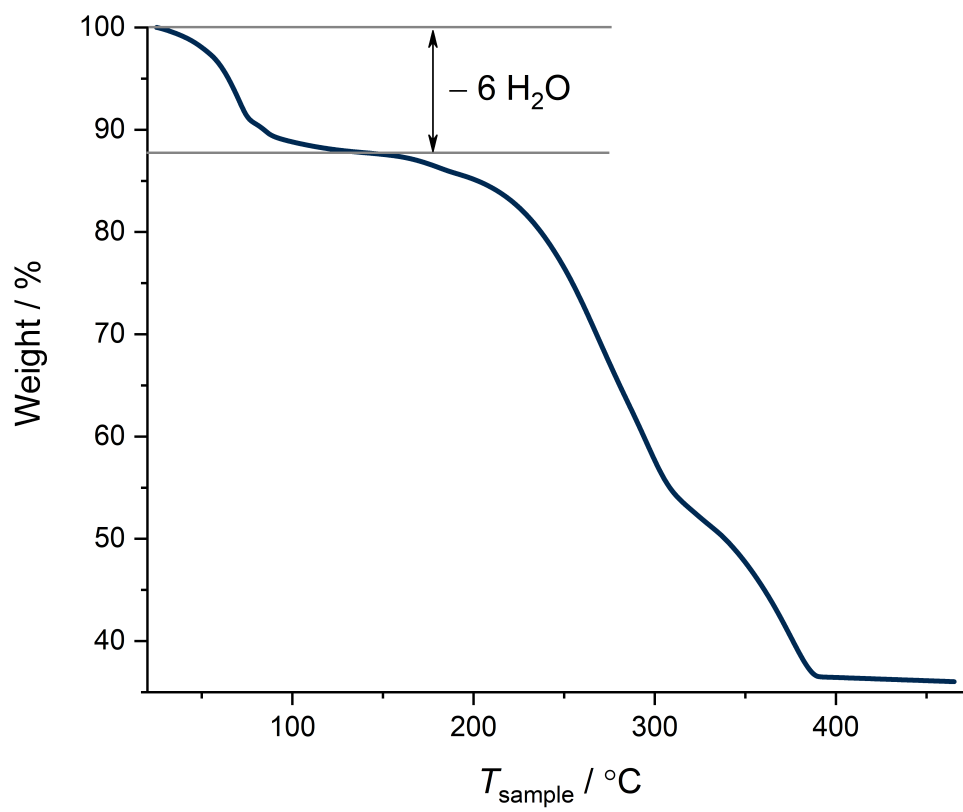

**Figure S3.** Thermogravimetric analysis of 1.

**Table S1.** Refinement and crystallographic data of **1** at  $T = 285$  K.

|                                                |                                                                        |
|------------------------------------------------|------------------------------------------------------------------------|
| <i>CCDC number</i>                             | <b>1897473</b>                                                         |
| Empirical formula                              | $C_{12}H_{12}Cl_4O_{14}U$                                              |
| Formula weight                                 | 760.05                                                                 |
| Crystal system                                 | monoclinic                                                             |
| Space group                                    | $C2/c$                                                                 |
| $a / \text{\AA}$                               | 13.8598(7)                                                             |
| $b / \text{\AA}$                               | 11.4960(6)                                                             |
| $c / \text{\AA}$                               | 12.6100(6)                                                             |
| $\alpha / ^\circ$                              | 90                                                                     |
| $\beta / ^\circ$                               | 96.415(5)                                                              |
| $\gamma / ^\circ$                              | 90                                                                     |
| $V / \text{\AA}^3$                             | 1996.60(17)                                                            |
| $Z$                                            | 4                                                                      |
| $\rho_{\text{calc}} / \text{g cm}^{-3}$        | 2.528                                                                  |
| $\mu / \text{mm}^{-1}$                         | 8.737                                                                  |
| $F(000)$                                       | 1424.0                                                                 |
| Radiation                                      | Mo $K\alpha$ ( $\lambda = 0.71073 \text{\AA}$ )                        |
| $2\theta$ range for data collection / $^\circ$ | 5.834 to 59.466                                                        |
| Index ranges                                   | $-16 \leq h \leq 18,$<br>$-15 \leq k \leq 11,$<br>$-15 \leq l \leq 17$ |
| Reflections collected                          | 5341                                                                   |
| Independent reflections                        | 2422                                                                   |
|                                                | $[R_{\text{int}} = 0.0221, R_{\text{sigma}} = 0.0305]$                 |
| Data/restraints/parameters                     | 2422/0/148                                                             |
| Goodness of fit on $F^2$                       | 1.057                                                                  |
| Final $R$ indexes [ $I \geq 2\sigma(I)$ ]      | $R_1 = 0.0200, wR_2 = 0.0434$                                          |
| Final $R$ Indexes [all data]                   | $R_1 = 0.0221, wR_2 = 0.0445$                                          |
| Largest diff. peak/hole / $e \text{\AA}^{-3}$  | 1.13/−0.83                                                             |

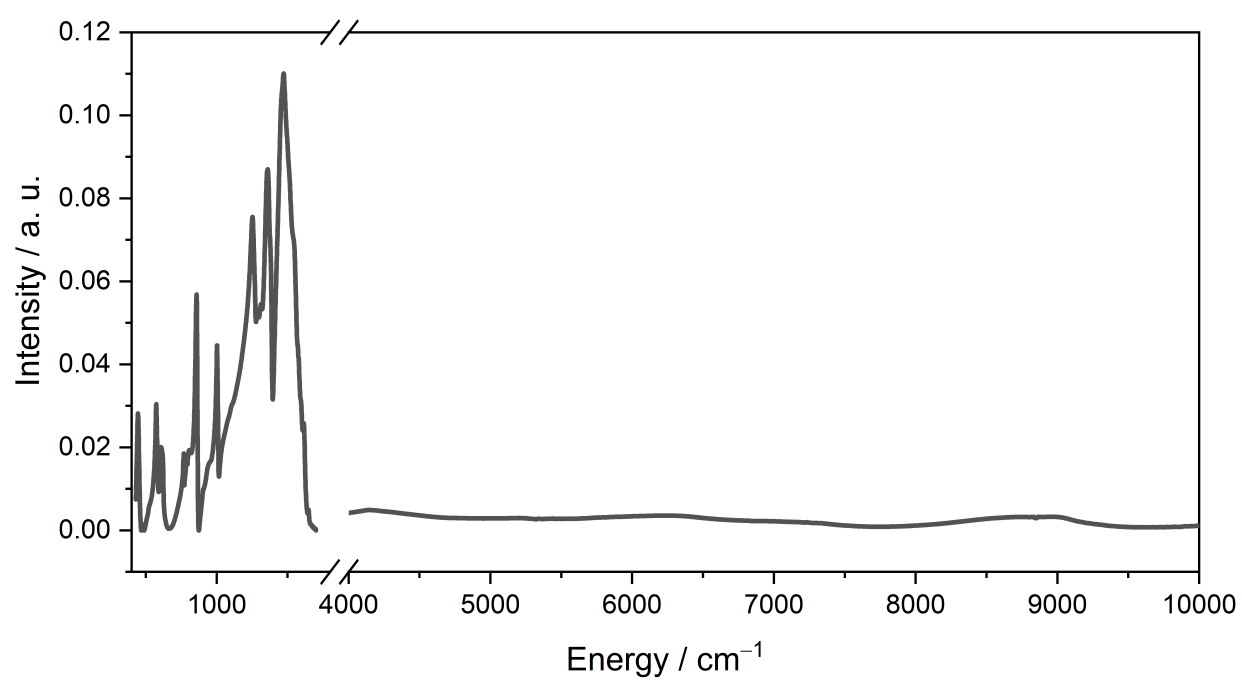

**Figure S4.** NIR/MIR spectrum of polycrystalline **1** obtained at RT.

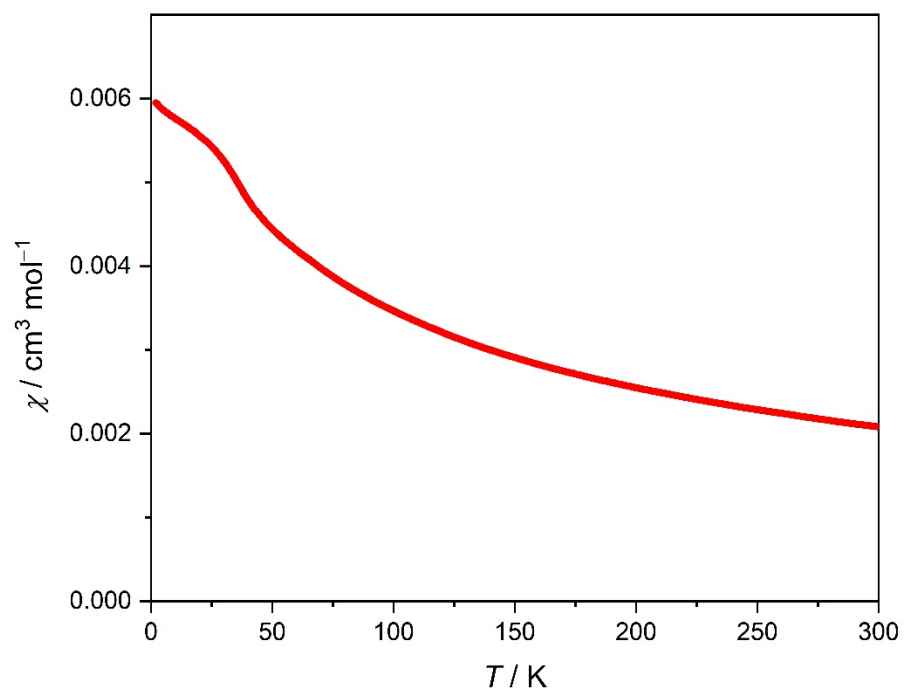

**Figure S5.** Magnetic susceptibility,  $\chi \equiv M/\mu_0 H$ , of polycrystalline **1** obtained with  $\mu_0 H = 1$  T.

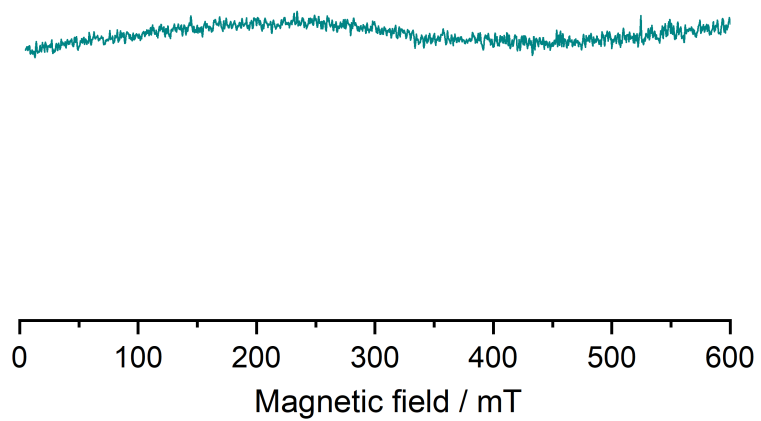

**Figure S6.** X-band EPR spectrum of polycrystalline **1** obtained at  $T = 77$  K.



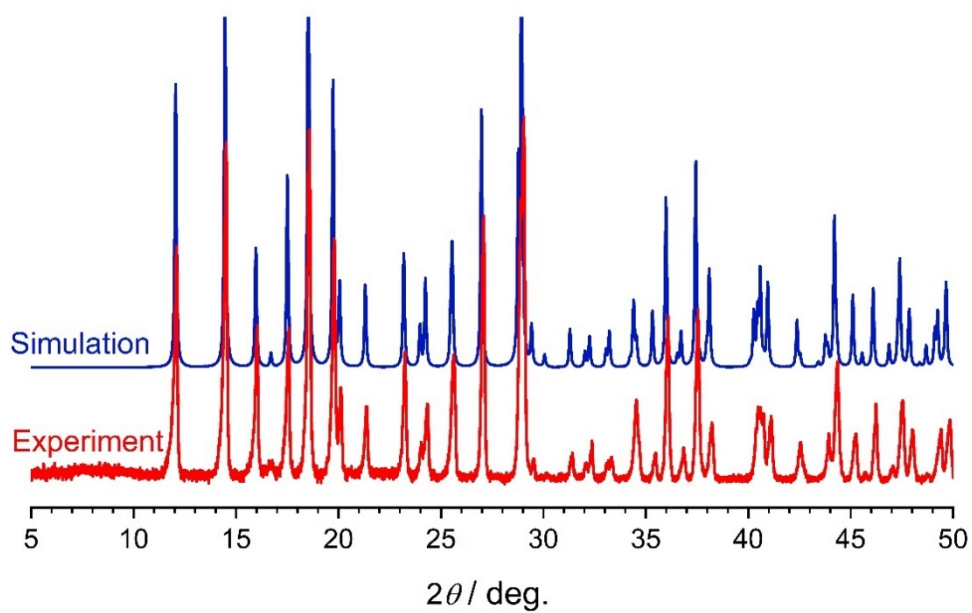

**Figure S7.** Experimental and simulated X-ray powder diffractogram of  $U(SO_4)_2 \cdot 4H_2O$  obtained at RT.

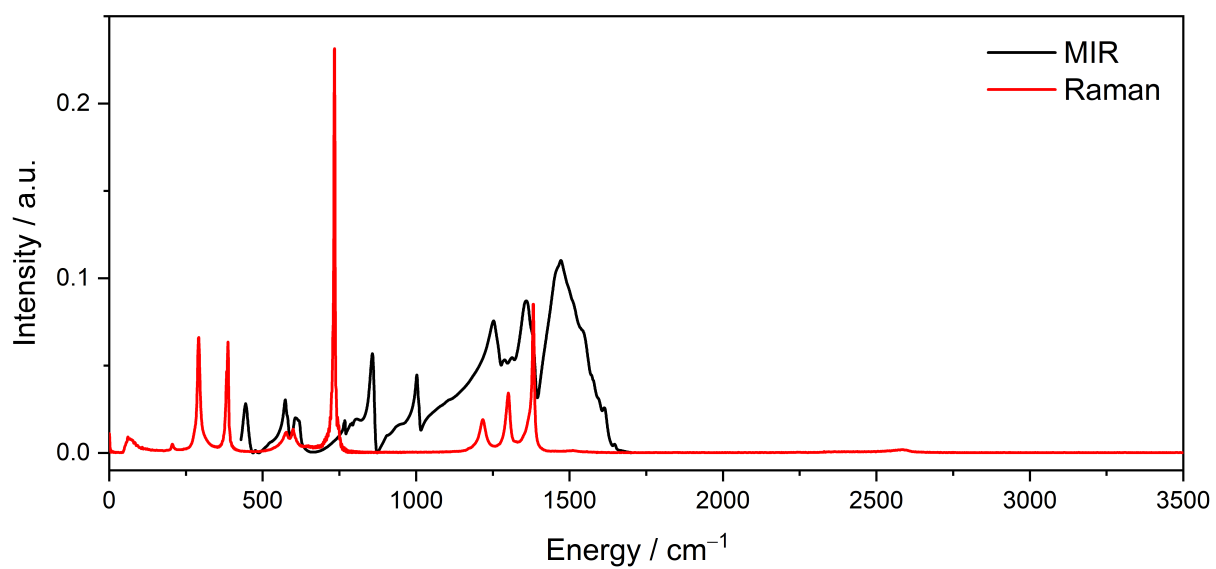

**Figure S8.** MIR and Raman spectra of polycrystalline **1** obtained at RT.
